# Supplementary material
Source: PubMed Central journal article supplement (PMC7962585)
Supplement: mmc1.pdf [file mmc1.pdf]

## Supplemental information

### **N-terminal domain antigenic mapping reveals a site of vulnerability for SARS-CoV-2**

**Matthew McCallum, Anna De Marco, Florian A. Lempp, M. Alejandra Tortorici, Dora Pinto, Alexandra C. Walls, Martina Beltramello, Alex Chen, Zhuoming Liu, Fabrizia Zatta, Samantha Zepeda, Julia di Iulio, John E. Bowen, Martin Montiel-Ruiz, Jiayi Zhou, Laura E. Rosen, Siro Bianchi, Barbara Guarino, Chiara Silacci Fregni, Rana Abdelnabi, Shi-Yan Caroline Foo, Paul W. Rothlauf, Louis-Marie Bloyet, Fabio Benigni, Elisabetta Cameroni, Johan Neyts, Agostino Riva, Gyorgy Snell, Amalio Telenti, Sean P.J. Whelan, Herbert W. Virgin, Davide Corti, Matteo Samuele Pizzuto, and David Veesler**

**Table S1. Summary table of NTD-specific mAbs. Related to Figure 1.**

| #  | Donor | mAb           | IgVH gene | HCDR3 length | VH % GL | IgVL gene | VL % GL | ELISA vs NTD (EC50 ng/ml) | Antigenic site | KD NTD (M) | NT IgG vs MLV-S2 pp (IC50 ng/ml) | Mx % NT | NT IgG vs live virus IC50 (ng/ml) | Mx % NT | NT Fab vs live virus IC50 (ng/ml) | Mx % NT |
|----|-------|---------------|-----------|--------------|---------|-----------|---------|---------------------------|----------------|------------|----------------------------------|---------|-----------------------------------|---------|-----------------------------------|---------|
| 1  | L     | S2L11         | 2-70      | 21           | 98.63   | K2-28     | 100     | 148.7                     | ii             | 7.25E-09   | nn                               | nn      |                                   |         |                                   |         |
| 2  |       | S2L12         | 3-21      | 19           | 98.26   | K3-15     | 97.49   | 8.943                     | iii            | na         | nn                               | nn      |                                   |         |                                   |         |
| 3  |       | S2L14         | 1-69      | 18           | 98.61   | L4-69     | 98.64   | 507.4                     | iii            | 1.18E-08   | nn                               | nn      |                                   |         |                                   |         |
| 4  |       | S2L20         | 3-30      | 15           | 97.92   | K1-33     | 96.42   | 447.7                     | iv             | 3.05E-08   | 2982                             | 98%     |                                   |         |                                   |         |
| 5  |       | S2L24         | 1-24      | 14           | 98.96   | K1-27     | 99.28   | 602.3                     | i              | 1.17E-08   | 49.1                             | 83.50%  |                                   |         |                                   |         |
| 6  |       | S2L26         | 1-24      | 14           | 97.22   | L3-10     | 98.21   | 47.72                     | i              | 4.56E-09   | 19.41                            | 77%     |                                   |         |                                   |         |
| 7  |       | <b>S2L28</b>  | 3-21      | 19           | 96.53   | L2-14     | 97.57   | 34.26                     | i              | 1.20E-07   | 76.38                            | 77%     | 26.2                              | 98.20%  | 928                               | 55.60%  |
| 8  |       | S2L35         | 4-30      | 21           | 96.9    | L1-51     | 98.25   | 22.1                      | iii            | 7.63E-09   | nn                               | nn      |                                   |         |                                   |         |
| 9  |       | S2L38         | 3-23      | 17           | 97.22   | K3-11     | 97.13   | 26.06                     | iii            | 1.62E-09   | nn                               | nn      |                                   |         |                                   |         |
| 10 |       | S2L50         | 4-59      | 20           | 95.44   | L3-25     | 98.92   | 63.72                     | i              | 5.96E-09   | 24.88                            | 91%     |                                   |         |                                   |         |
| 11 | M     | S2M24         | 4-61      | 20           | 97.25   | K1-39     | 95.34   | 698.7                     | vi             | 6.98E-09   | nn                               | nn      |                                   |         |                                   |         |
| 12 |       | <b>S2M28</b>  | 3-33      | 12           | 97.57   | L3-25     | 97.85   | 31.66                     | i              | 6.89E-09   | 53.73                            | 88%     | 5                                 | 98.50%  | 26.3                              | 66%     |
| 13 | X     | S2X15         | 1-3       | 21           | 98.98   | K3-11     | 96.14   | 12.3                      | iii            | 1.87E-09   | nn                               | nn      |                                   |         |                                   |         |
| 14 |       | <b>S2X28</b>  | 3-30      | 18           | 97.92   | L3-10     | 99.64   | 337.6                     | i              | na         | 90                               | 91%     | 9.1                               | 99.10%  | 248.9                             | 87.30%  |
| 15 |       | S2X49         | 2-26      | 14           | 98.66   | L1-40     | 98.98   | 18.5                      | iii            | 4.97E-09   | nn                               | nn      |                                   |         |                                   |         |
| 16 |       | S2X51         | 3-21      | 20           | 98.95   | K3-15     | 98.29   | 14.2                      | iii            | 3.24E-08   | nn                               | nn      |                                   |         |                                   |         |
| 17 |       | S2X72         | 3-21      | 21           | 97.21   | K3-15     | 98.93   | 19.4                      | iii            | 2.19E-08   | nn                               | nn      |                                   |         |                                   |         |
| 18 |       | S2X90         | 4-4       | 13           | 97.61   | L2-23     | 96.94   | 11.5                      | iii            | 3.35E-09   | nn                               | nn      |                                   |         |                                   |         |
| 19 |       | S2X91         | 1-24      | 21           | 97.28   | K2-24     | 97.64   | 60.5                      | i              | 3.39E-09   | 40.3                             | 87%     |                                   |         |                                   |         |
| 20 |       | S2X93         | 3-33      | 20           | 97.97   | K3-15     | 96.51   | 13.4                      | iii            | 6.71E-08   | nn                               | nn      |                                   |         |                                   |         |
| 21 |       | S2X94         | 3-53      | 14           | 97.6    | K3-15     | 98.59   | 8.7                       | iii            | 3.73E-08   | nn                               | nn      |                                   |         |                                   |         |
| 22 |       | S2X98         | 3-21      | 24           | 97.61   | K3-15     | 99.65   | 20                        | iii            | 6.14E-08   | nn                               | nn      |                                   |         |                                   |         |
| 23 |       | S2X102        | 4-59      | 15           | 97.81   | K3-20     | 96.81   | 24.3                      | iii            | 8.23E-09   | nn                               | nn      |                                   |         |                                   |         |
| 24 |       | S2X105        | 4-59      | 17           | 98.29   | K3-15     | 99.3    | 12.4                      | iii            | 1.39E-08   | nn                               | nn      |                                   |         |                                   |         |
| 25 |       | S2X107        | 4-38      | 16           | 96.95   | K1-39     | 96.83   | 69                        | i              | 4.08E-08   | 7.9                              | 65%     |                                   |         |                                   |         |
| 26 |       | S2X124        | 3-30      | 22           | 98.98   | K1-13     | 98.25   | 30                        | i              | 4.70E-08   | 8.9                              | 68%     |                                   |         |                                   |         |
| 27 |       | S2X125        | 3-21      | 17           | 95.6    | L1-40     | 97.57   | 24                        | iii            | 3.39E-09   | nn                               | nn      |                                   |         |                                   |         |
| 28 |       | S2X158        | 1-24      | 16           | 96.25   | L1-47     | 95.91   | 18.7                      | i              | 8.54E-09   | 32.2                             | 96%     |                                   |         |                                   |         |
| 29 |       | S2X161        | 1-46      | 21           | 95.46   | L3-25     | 99.64   | 16.4                      | i              | 8.42E-09   | 17                               | 83%     |                                   |         |                                   |         |
| 30 |       | S2X165        | 4-61      | 20           | 96.65   | L10-54    | 96.59   | 51.8                      | i              | 3.46E-08   | 61.07                            | 98%     |                                   |         |                                   |         |
| 31 |       | S2X169        | 3-23      | 17           | 97.96   | L1-51     | 98.64   | 10.9                      | iii            | 1.49E-08   | nn                               | nn      |                                   |         |                                   |         |
| 32 |       | S2X170        | 3-21      | 20           | 96.96   | K3-15     | 97.9    | 26.7                      | iii            | 1.62E-08   | nn                               | nn      |                                   |         |                                   |         |
| 33 |       | S2X173        | 4-59      | 15           | 97.95   | L3-21     | 97.21   | 52.8                      | v              | 1.22E-08   | nn                               | nn      |                                   |         |                                   |         |
| 34 |       | S2X175        | 3-21      | 20           | 97.72   | K3-15     | 96.167  | 16.8                      | iii            | 8.94E-09   | nn                               | nn      |                                   |         |                                   |         |
| 35 |       | S2X176        | 2-70      | 10           | 98.65   | K4-1      | 98.01   | 474.6                     | ii             | 1.08E-08   | nn                               | nn      |                                   |         |                                   |         |
| 36 |       | S2X186        | 1-2       | 12           | 98.97   | L2-23     | 98.62   | 18.3                      | iii            | 9.58E-09   | nn                               | nn      |                                   |         |                                   |         |
| 37 |       | S2X303        | 2-5       | 17           | 95.88   | L3-1      | 95.34   | 14.2                      | i              | 6.30E-09   | 79.1                             | 85%     |                                   |         |                                   |         |
| 38 |       | S2X310        | 4-34      | 20           | 97.14   | L2-23     | 96.53   | 8                         | iii            | 5.58E-09   | nn                               | nn      |                                   |         |                                   |         |
| 39 |       | S2X316        | 3-48      | 18           | 99.66   | K2-29     | 94.73   | 97.8                      | v              | 1.77E-08   | nn                               | nn      |                                   |         |                                   |         |
| 40 |       | S2X320        | 3-33      | 17           | 96.53   | K1-33     | 97.85   | 26.9                      | i              | 1.81E-08   | 147.9                            | 42%     |                                   |         |                                   |         |
| 41 |       | <b>S2X333</b> | 3-33      | 17           | 96.53   | L3-21     | 97.49   | 7.6                       | i              | 2.89E-08   | 43.3                             | 94%     | 3                                 | 98.70%  | 6.1                               | 82.20%  |

**Table S2. Cryo-EM data collection, refinement and validation statistics of NTD-specific neutralizing Fab fragments in complex with SARS-CoV-2 S. Related to Figure 2.**

|                                                     | S + S2M11 + S2X333 |           | S + S2M11 + S2M28 |           | S + S2M11 + S2L28 |           |
|-----------------------------------------------------|--------------------|-----------|-------------------|-----------|-------------------|-----------|
| <b>Data collection and processing</b>               |                    |           |                   |           |                   |           |
| Magnification (nominal)                             | 130,000            |           | 130,000           |           | 130,000           |           |
| Voltage (kV)                                        | 300                |           | 300               |           | 300               |           |
| Electron exposure (e <sup>-</sup> /Å <sup>2</sup> ) | 70                 |           | 70                |           | 70                |           |
| Defocus range (µm)                                  | 0.8-2.0            |           | 0.8-2.0           |           | 0.8-2.0           |           |
| Pixel size (Å)                                      | 0.896              |           | 1.05              |           | 1.05              |           |
| Processing Type                                     | Global             | Local     | Global            | Local     | Global            | Local     |
| Symmetry imposed                                    | C3                 | C1        | C3                | C1        | C3                | C1        |
| Initial particle images (no.)                       | 490,229            | 785,859   | 383,144           | 665,979   | 356,514           | 473,310   |
| Final particle images (no.)                         | 261,953            | 99,627    | 221,993           | 282,884   | 157,770           | 81,887    |
| Map resolution (Å)                                  | 2.2                | 2.8       | 2.5               | 2.6       | 2.6               | 3.0       |
| FSC threshold                                       | 0.143              | 0.143     | 0.143             | 0.143     | 0.143             | 0.143     |
| <b>Refinement</b>                                   |                    |           |                   |           |                   |           |
| Initial model used (PDB code)                       | 7K43               | 6ZGE      | 7K43              | 6ZGE      | 7K43              | 6ZGE      |
| Model resolution (Å)                                | 2.4                | 3.3       | 2.7               | 3.1       | 2.7               | 3.3       |
| FSC threshold                                       | 0.5                | 0.5       | 0.5               | 0.5       | 0.5               | 0.5       |
| Map sharpening B factor (Å <sup>2</sup> )           | -56                | -35       | -69               | -26       | -70               | -23       |
| Model composition                                   |                    |           |                   |           |                   |           |
| Nonhydrogen atoms                                   | 33,987             | 2,524     | 34,471            | 2,805     | 34,353            | 2,740     |
| Protein residues                                    | 4,446              | 317       | 4,470             | 354       | 4,557             | 352       |
| Glycan residues                                     | 69                 | 5         | 69                | 6         | 78                | 4         |
| Water                                               | 729                |           |                   |           |                   |           |
| B factors (Å <sup>2</sup> )                         |                    |           |                   |           |                   |           |
| Protein                                             | 27.7               | 28.6      | 19.4              | 98.7      | 15.9              | 26.9      |
| Glycans                                             | 45.1               | 31.9      | 20.9              | 119.6     | 34.4              | 28.5      |
| R.m.s. deviations                                   |                    |           |                   |           |                   |           |
| Bond angles (°)                                     | 1.2                | 1.00      | 0.01              | 0.98      | 1.2               | 0.96      |
| Bond lengths (Å)                                    | 0.01               | 0.01      | 0.99              | 0.01      | 0.01              | 0.01      |
| <b>Validation</b>                                   |                    |           |                   |           |                   |           |
| MolProbity score                                    | 0.87               | 0.65      | 0.69              | 0.69      | 0.71              | 0.87      |
| Clashscore                                          | 1.39               | 0.41      | 0.58              | 0.55      | 0.64              | 0.38      |
| Rotamer outliers (%)                                | 0.09               | 0.00      | 0.19              | 0.36      | 0.00              | 0.00      |
| Ramachandran plot                                   |                    |           |                   |           |                   |           |
| Favored (%)                                         | 98.2               | 98.7      | 98                | 98.8      | 98                | 96.43     |
| Allowed (%)                                         | 1.8                | 1.3       | 2                 | 1.2       | 2                 | 3.57      |
| EMRinger score                                      | 4.97               | 5.37      | 4.3               | 5.23      | 3.89              | 4.2       |
| <b>Data Availability</b>                            |                    |           |                   |           |                   |           |
| EMDB                                                | EMD-23579          | EMD-23577 | EMD-23582         | EMD-23581 | EMD-23580         | EMD-23578 |
| PDB                                                 | PDB 7LXY           | PDB 7LXW  | PDB 7LY2          | PDB 7LY0  | PDB 7LXZ          | PDB 7LXX  |

**Table S3. Data collection and refinement statistics. Related to Figure 2.**

| SARS-CoV-2 NTD +<br>S2M28 Fab                  |                                                       |
|------------------------------------------------|-------------------------------------------------------|
| <b>Data collection</b>                         |                                                       |
| Facility                                       | ALS                                                   |
| Beamline                                       | 5.0.2                                                 |
| Wavelength (Å)                                 | 0.97741                                               |
| Space group                                    | <i>P</i> 2 <sub>1</sub> 2 <sub>1</sub> 2 <sub>1</sub> |
| Cell dimensions                                |                                                       |
| <i>a</i> , <i>b</i> , <i>c</i> (Å)             | 66.4 125.5 365.9                                      |
| $\alpha$ , $\beta$ , $\gamma$ (°)              | 90, 90, 90                                            |
| Resolution Range (Å)                           | 50-3.0 (3.1-3.0)                                      |
| $R_{\text{Sym}}^{\ddagger}$                    | 0.19 (2.16)                                           |
| $R_{\text{pim}}^{\ddagger}$                    | 0.05 (0.60)                                           |
| $\text{CC}^{\ddagger}$                         | 1.00 (0.91)                                           |
| <i>I</i> / $\sigma$ <i>I</i>                   | 12.60 (1.39)                                          |
| Completeness (%)                               | 100 (100)                                             |
| Redundancy                                     | 13.3 (13.5)                                           |
| <b>Refinement</b>                              |                                                       |
| No. reflections                                | 62,425                                                |
| $R_{\text{work}} / R_{\text{free}}^{\ddagger}$ | 0.209 / 0.234                                         |
| No. atoms                                      |                                                       |
| Protein                                        | 11009                                                 |
| Ligand/ion                                     | 465                                                   |
| Water                                          | 0                                                     |
| <i>B</i> -factors                              |                                                       |
| Protein                                        | 91.4                                                  |
| Ligand/ion                                     | 150.2                                                 |
| R.m.s. deviations                              |                                                       |
| Bond lengths (Å)                               | 0.04                                                  |
| Bond angles (°)                                | 1.6                                                   |
| Ramachandran Statistics                        |                                                       |
| Favored                                        | 97.23                                                 |
| Allowed                                        | 100                                                   |
| <b>Data availability</b>                       | PDB 7LY3                                              |

Note: Values in parentheses correspond to the highest resolution shell.

$\ddagger$ ,  $R_{\text{Sym}} = \sum \sum |I - \langle I \rangle| / \sum \sum I$ ,  $R_{\text{pim}} = \sum \sqrt{1/(n-1)} \sum |I - \langle I \rangle| / \sum \sum I$ , and  $\text{CC}^{\ddagger} = \sqrt{2\text{CC}_{1/2}/(1+\text{CC}_{1/2})}$  where  $\text{CC}_{1/2}$  is the Pearson correlation coefficient of two half data sets as described elsewhere (Karplus and Diederichs, 2012)

$\ddagger$ ,  $R_{\text{work}} = \sum | |F_{\text{obs}}| - k|F_{\text{calc}}| | / |F_{\text{obs}}|$  where  $F_{\text{obs}}$  and  $F_{\text{calc}}$  are the observed and calculated structure factors, respectively.  $R_{\text{free}}$  is the sum extended over a subset of reflections (5%) excluded from all stages of the refinement.

**Table S4. Cryo-EM data collection, refinement and validation statistics of NTD-specific non neutralizing Fab fragments in complex with SARS-CoV-2 S. Related to Figure 2.**

|                                                     | 2P-DS-S +<br>S2X28 | S + S2M11 +<br>S2L20 | S + S2M11 +<br>S2X316 | S + S2M11 +<br>S2M24 |
|-----------------------------------------------------|--------------------|----------------------|-----------------------|----------------------|
| <b>Data collection</b>                              |                    |                      |                       |                      |
| Magnification (nominal)                             | 130,000            | 36,000               | 130,000               | 130,000              |
| Voltage (kV)                                        | 300                | 200                  | 200                   | 200                  |
| Electron exposure (e <sup>-</sup> /Å <sup>2</sup> ) | 60                 | 60                   | 60                    | 60                   |
| Defocus range (μm)                                  | 0.8-2.0            | 0.8-2.0              | 0.8-2.0               | 0.8-2.0              |
| Pixel size (Å)                                      | 1.16               | 1.16                 | 1.16                  | 1.16                 |
| <b>Processing</b>                                   |                    |                      |                       |                      |
| Symmetry imposed                                    | C1                 | C3                   | C3                    | C3                   |
| Initial particle images (no.)                       | 140,562            | 8,345                | 11,695                | 5,840                |
| Final particle images (no.)                         | 36,413             | 3,588                | 4,340                 | 3,770                |
| Map resolution (Å)                                  | ~4-5               | 6.3                  | 6.0                   | 6.5                  |
| FSC threshold                                       | 0.143              | 0.143                | 0.143                 | 0.143                |
| Map sharpening <i>B</i> factor (Å <sup>2</sup> )    | -28                | -264                 | -168                  | -255                 |
| <b>Data Availability</b>                            |                    |                      |                       |                      |
| EMDB                                                | EMD-23584          | EMD-23586            | EMD-23585             | EMD-23583            |

**Table S5. Percentage of S2X28 binding inhibition to NTD by plasma samples as measured in a blockade-of-binding ELISA. Related to Figure 3.**

| Status                  | Sample code | % S2X28 inhibition | SD%   |
|-------------------------|-------------|--------------------|-------|
| <b>Hospitalized</b>     | P5-OLS      | 69.38              | 3.12  |
|                         | P16-OLS     | 25.73              | 2.68  |
|                         | P6-OLS      | 75.39              | 5.03  |
|                         | P7-OLS      | 70.12              | 0.86  |
| <b>Symptomatic</b>      | P6-DVL      | 17.63              | 1.84  |
|                         | P2-CLM      | 20.49              | 0.73  |
|                         | P5-DVL      | 25.61              | 1.26  |
| <b>Asymptomatic</b>     | AS-4-FR     | 39.13              | 3.24  |
|                         | AS-1-AL     | 21.30              | 4.70  |
| <b>Convalescent-Vx1</b> | CLM-A-001   | 87.63              | 1.75  |
|                         | CLM-A-002   | 60.26              | 0.14  |
|                         | CLM-A-003   | 75.25              | 0.49  |
|                         | CLM-A-004   | 56.06              | 12.65 |
|                         | CLM-A-005   | 57.14              | 1.41  |
| <b>Vx1</b>              | CLM-B-002   | 9.97               | 2.51  |
|                         | CLM-B-003   | 3.79               | 1.26  |
|                         | CLM-B-004   | 3.55               | 0.17  |
|                         | CLM-B-005   | 3.86               | 0.10  |
|                         | CLM-B-006   | 9.95               | 0.85  |

Note: Values collected at 1:6 plasma dilution.

Convalescent-Vx1= plasma collected 14 days after administration of the first dose of mRNA-based vaccine from individuals previously exposed to SARS-CoV-2; Vx1 = plasma collected 14 days after administration of the first dose of mRNA-based vaccine from individual with no history of SARS-CoV-2 infections.

## **Data S1. Extended data sets**

### **Related to Figure 1**

Binding of the 41 isolated NTD mAbs to immobilized SARS-CoV-2 S ectodomain trimer, NTD (domain A) or RBD analyzed by ELISA. (Pages 2-3)

SARS-CoV-2 S pseudovirus neutralization. (Pages 4-5)

### **Related to Figure 3**

Epitope binning of the 41 NTD-specific mAbs isolated using the SARS-CoV-2 S ectodomain trimer or the isolated NTD. (Pages 6-9)

### **Related to Figure 4**

NTD mAb binding to a panel of sarbecovirus S glycoproteins analyzed by flow cytometry (MFI values). (Page 10)

### **Related to Figures 4 and 5**

Binding of the S2X333, S2M28, S2L28, S2X28, S2L20 or 4A8 mAbs to immobilized NTD mutants analyzed by ELISA. (Page 11)

### **Related to Figure 5**

S2L28, S2M28, S2X28, and S2X333 escape clone sequencing results (VSV SARS-CoV-2 S experiments). (Page 12)

Binding of the 41 isolated NTD mAbs to immobilized SARS-CoV-2 S ectodomain trimer, NTD (domain A) or RBD analyzed by ELISA. Related to Figure 1.

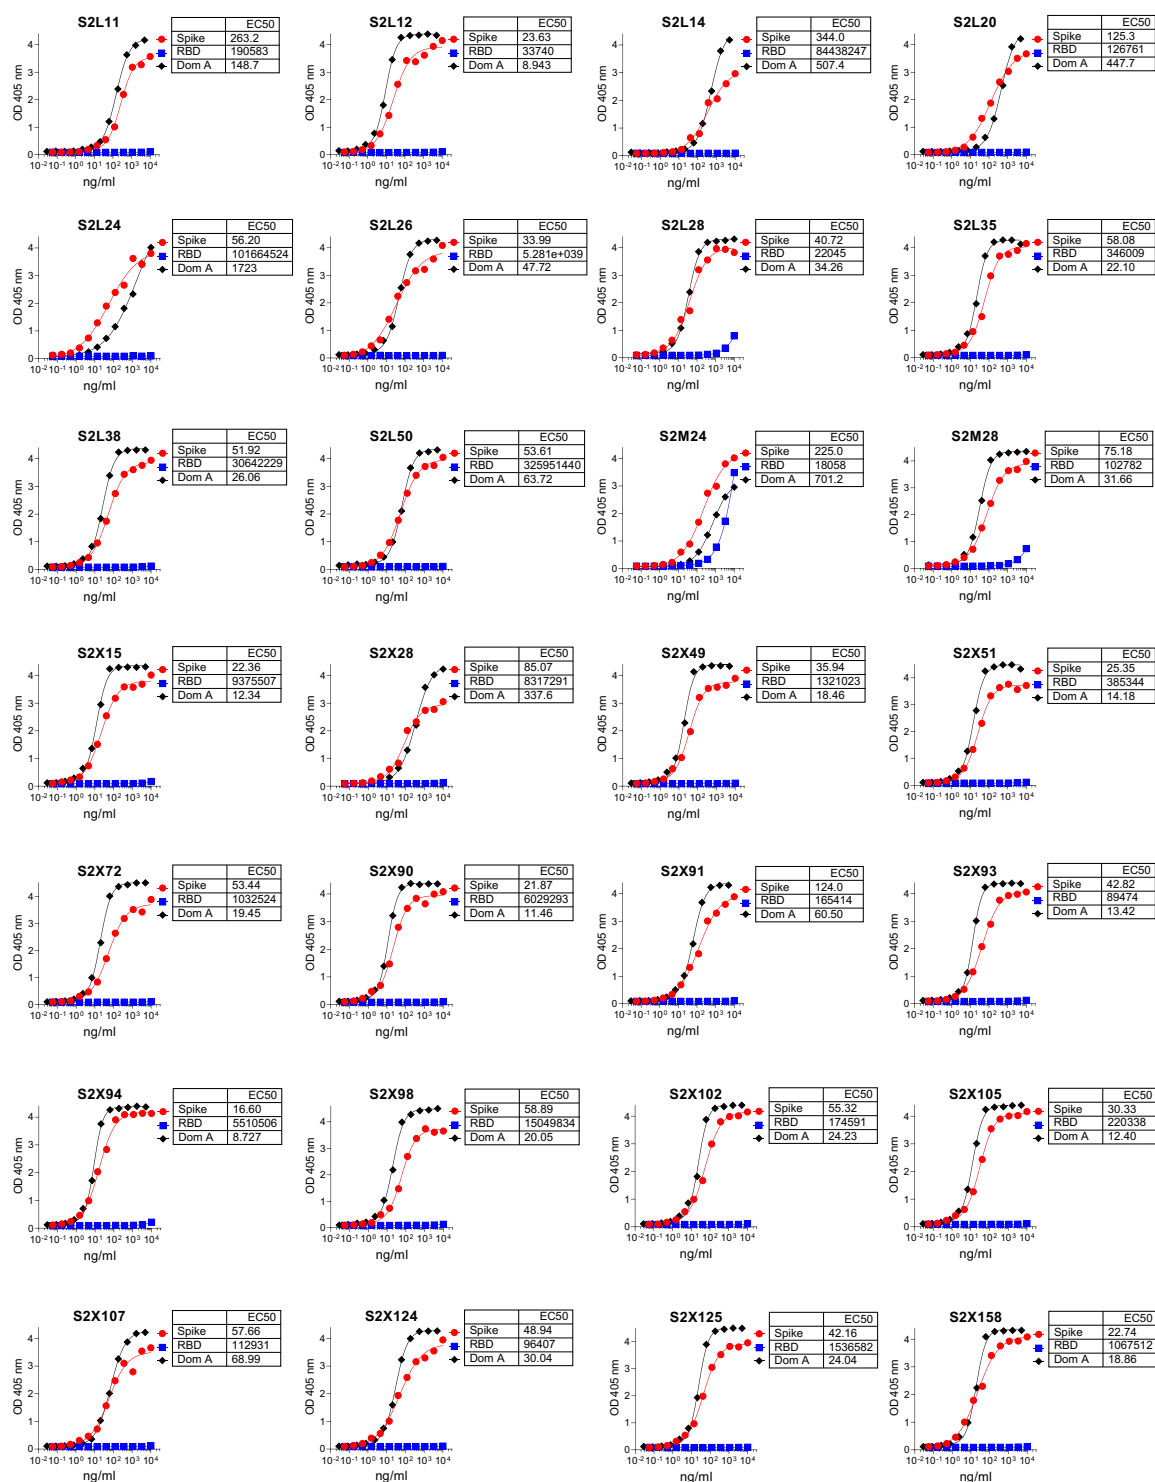



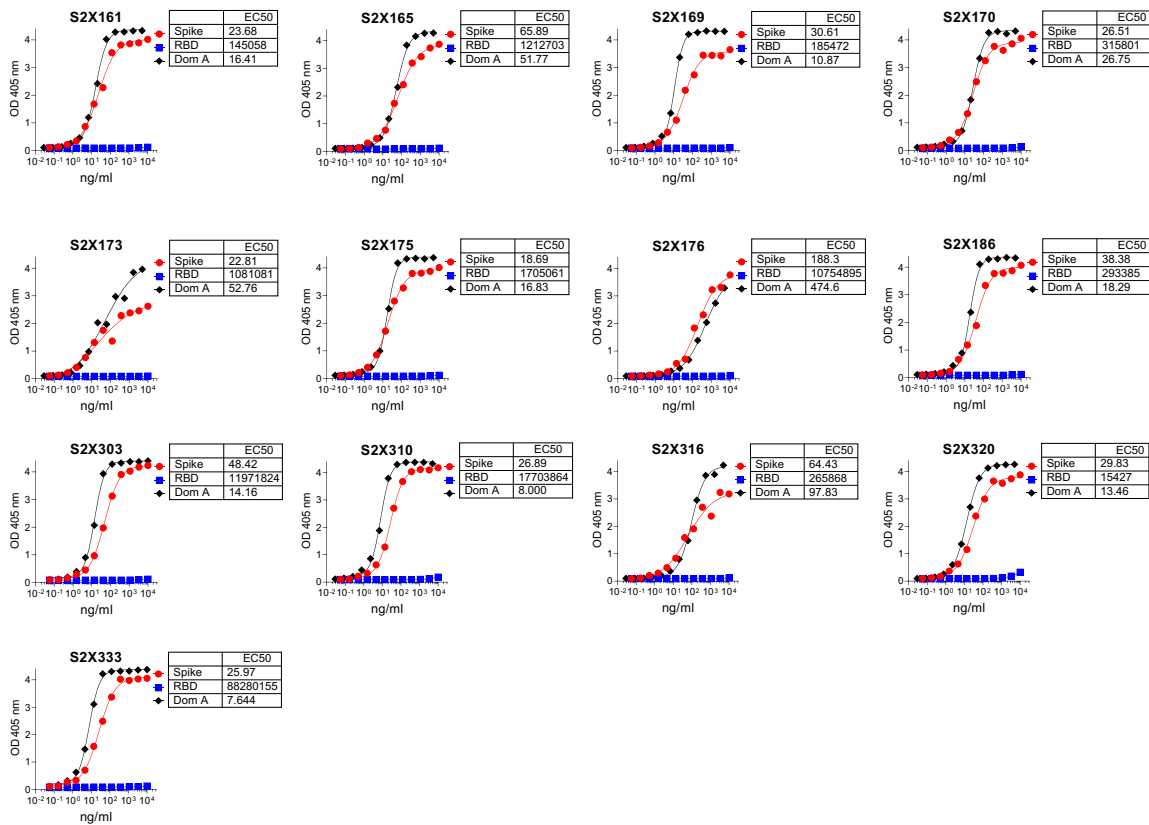

## SARS-CoV-2 S pseudovirus neutralization. Related to Figure 1.

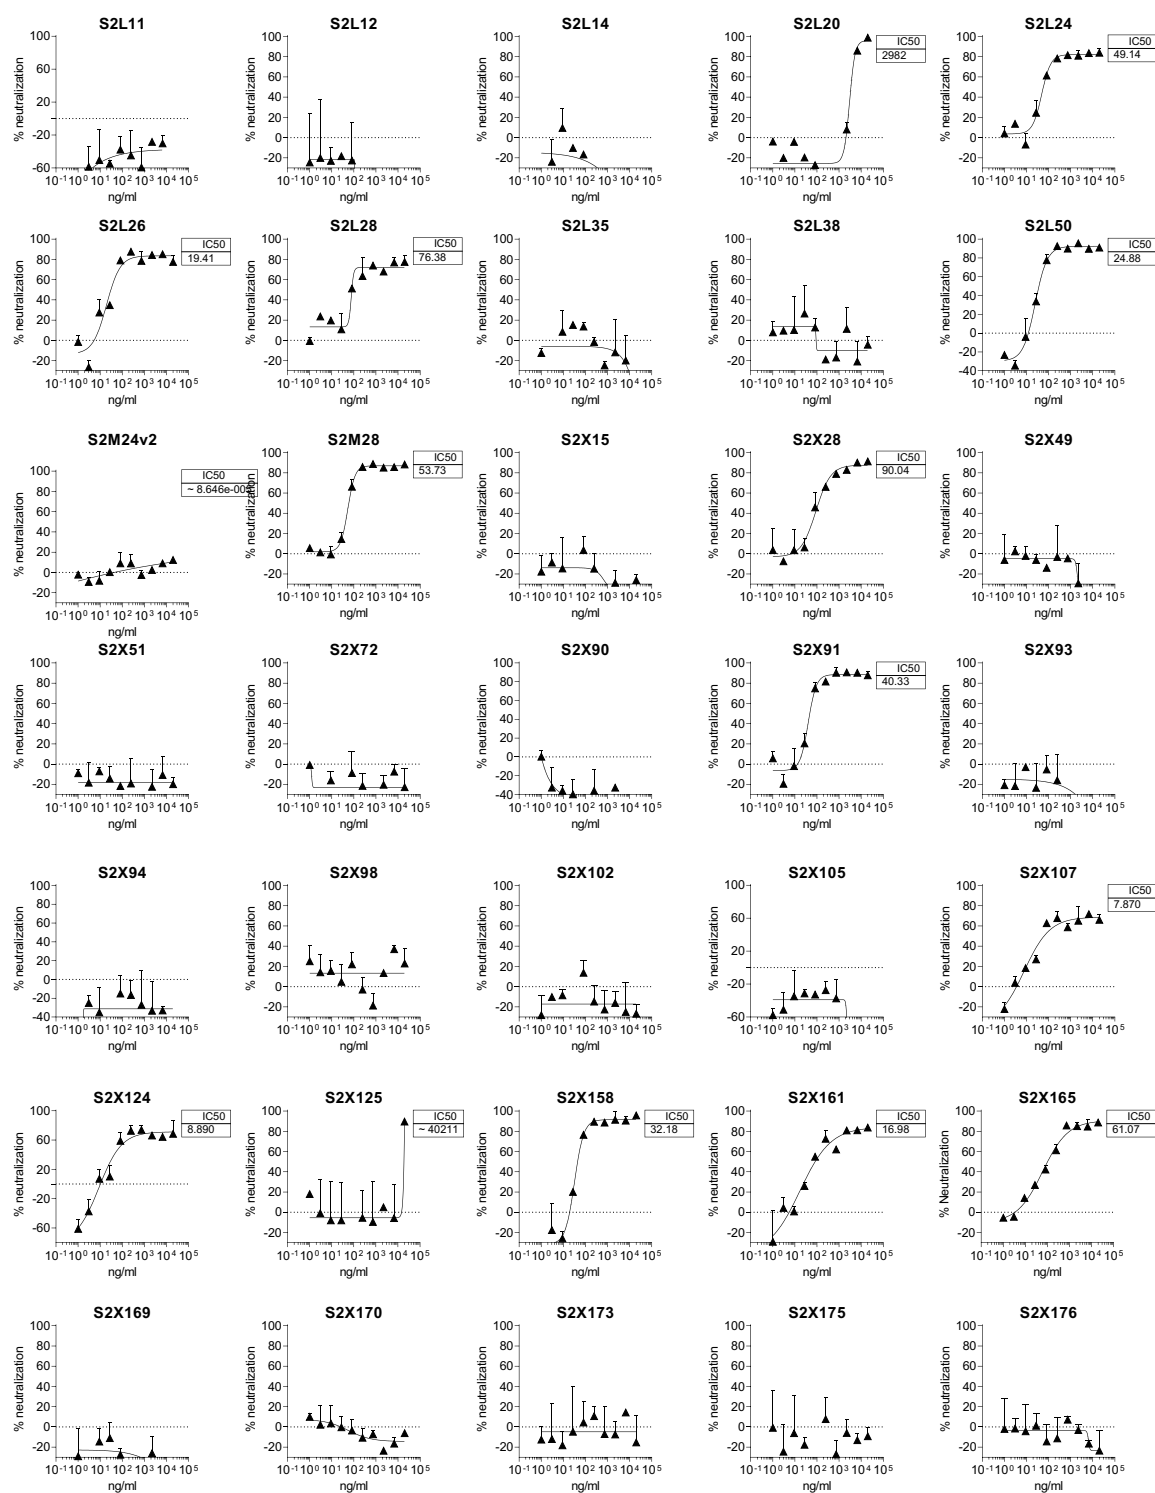

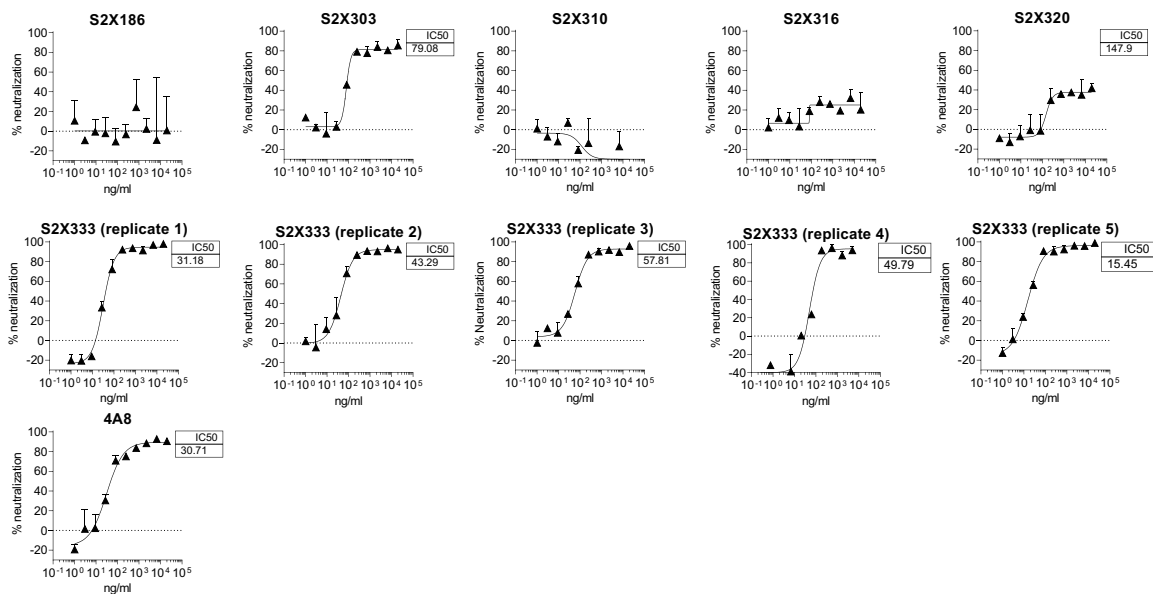

Epitope binning of the 41 NTD-specific mAbs isolated using the SARS-CoV-2 S ectodomain trimer or the isolated NTD. Related to Figure 3.

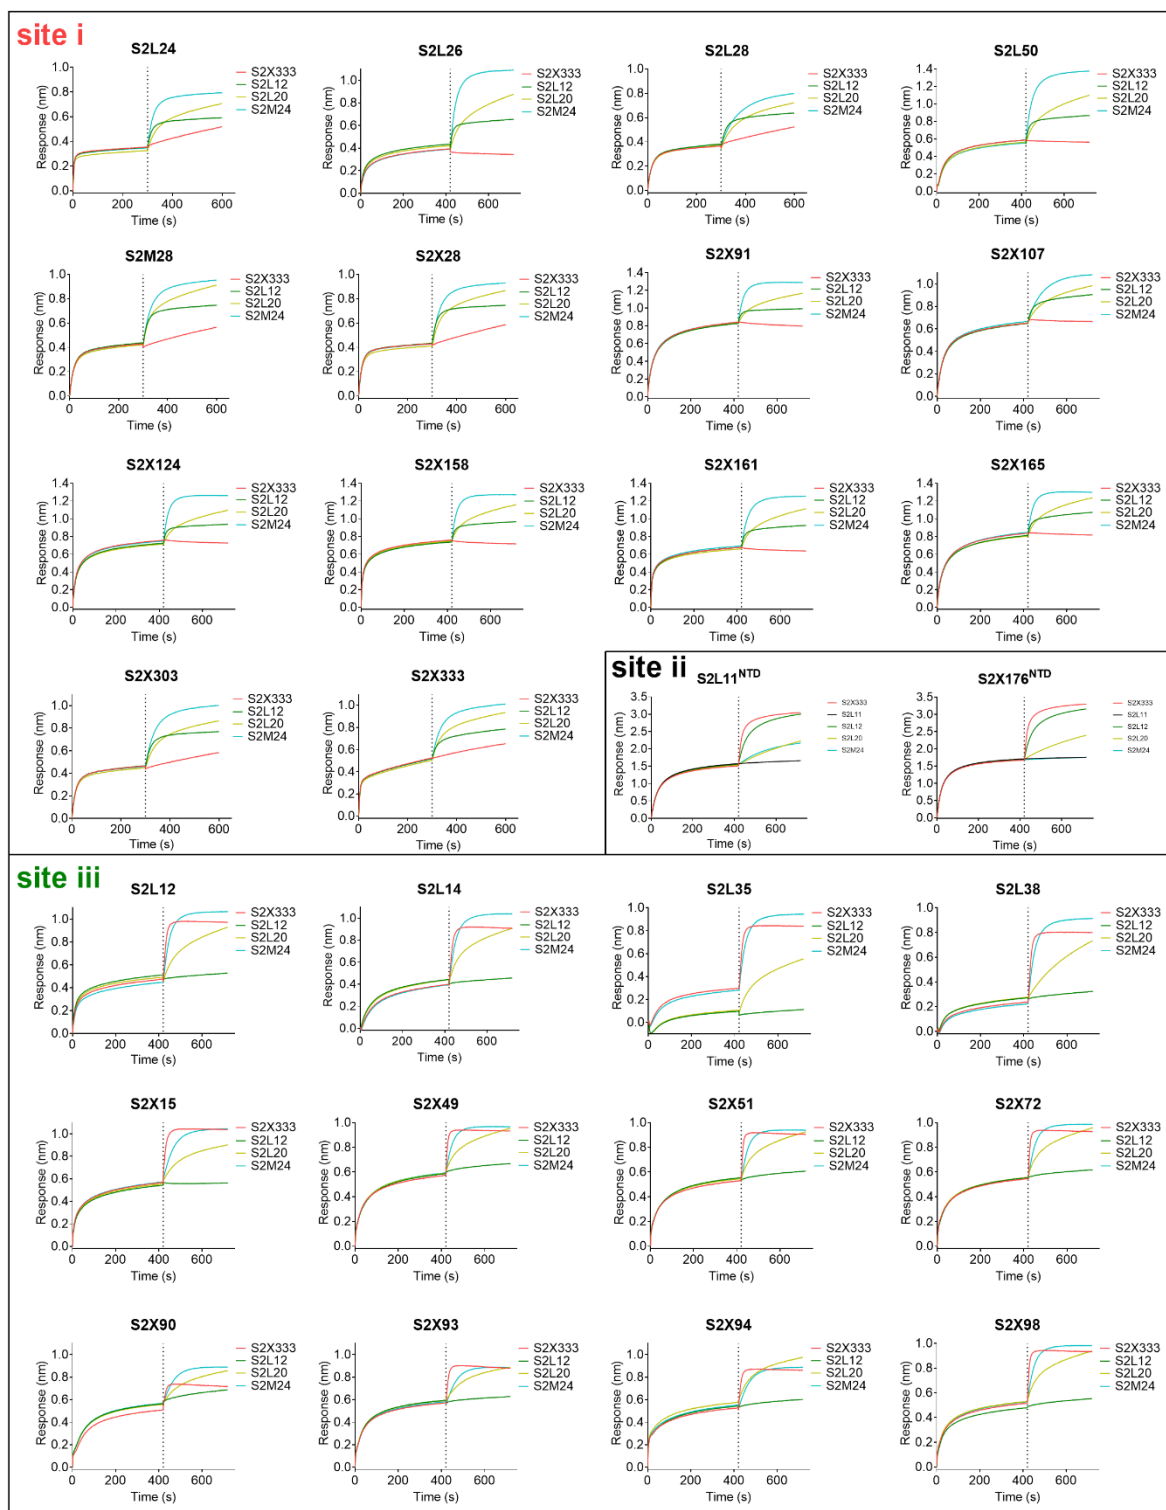

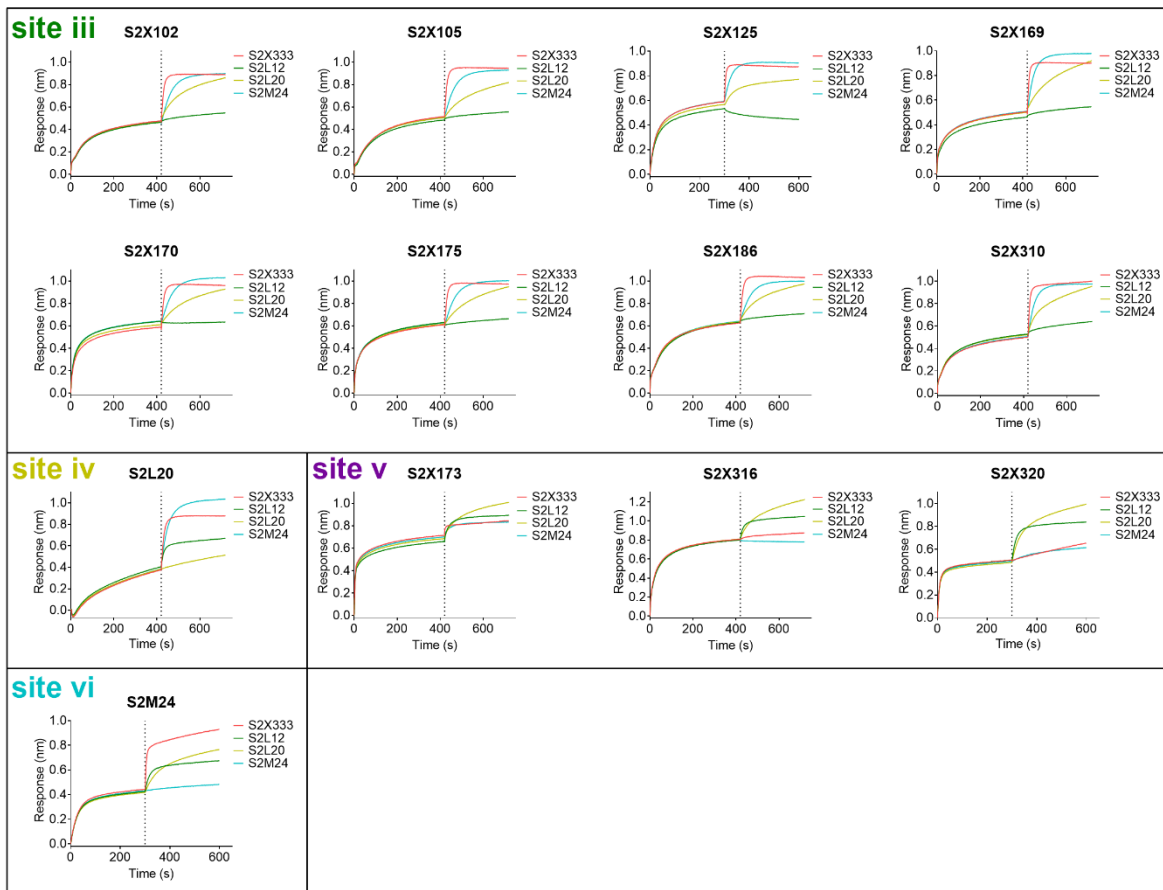

## site i

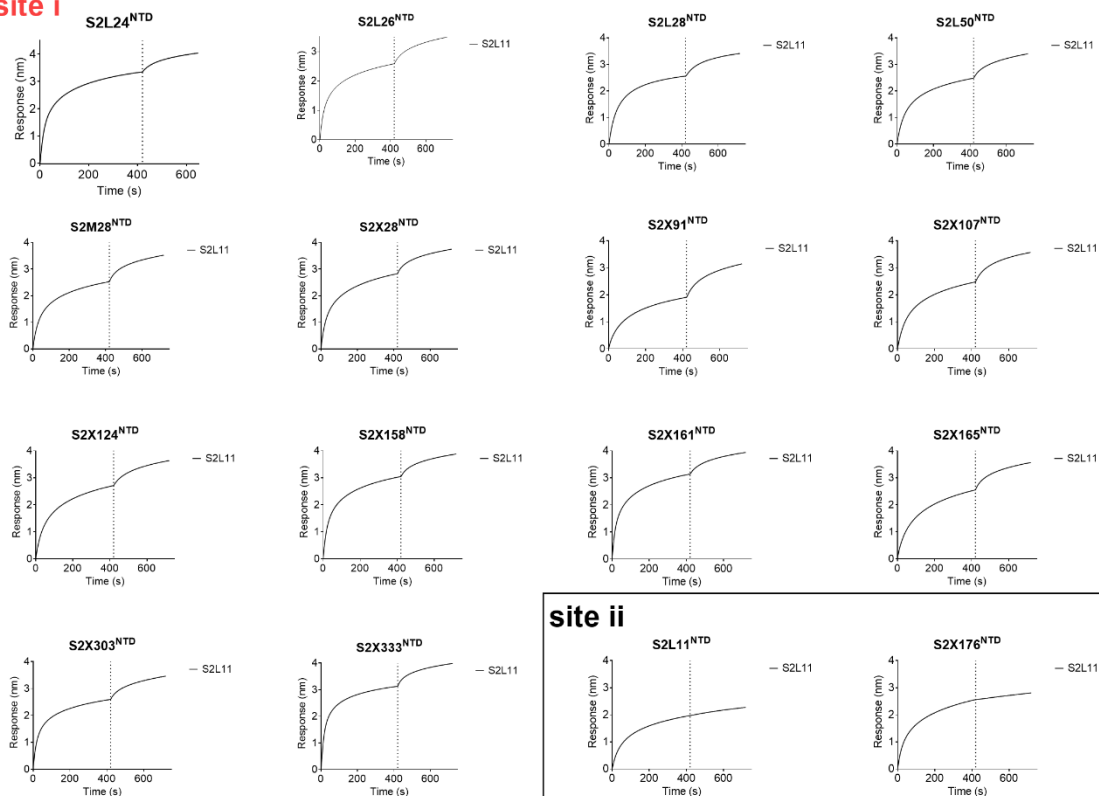

## site ii

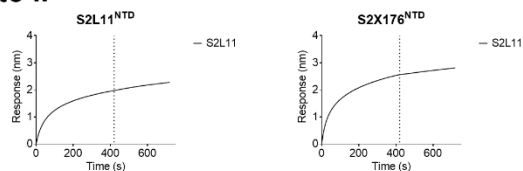

## site iii

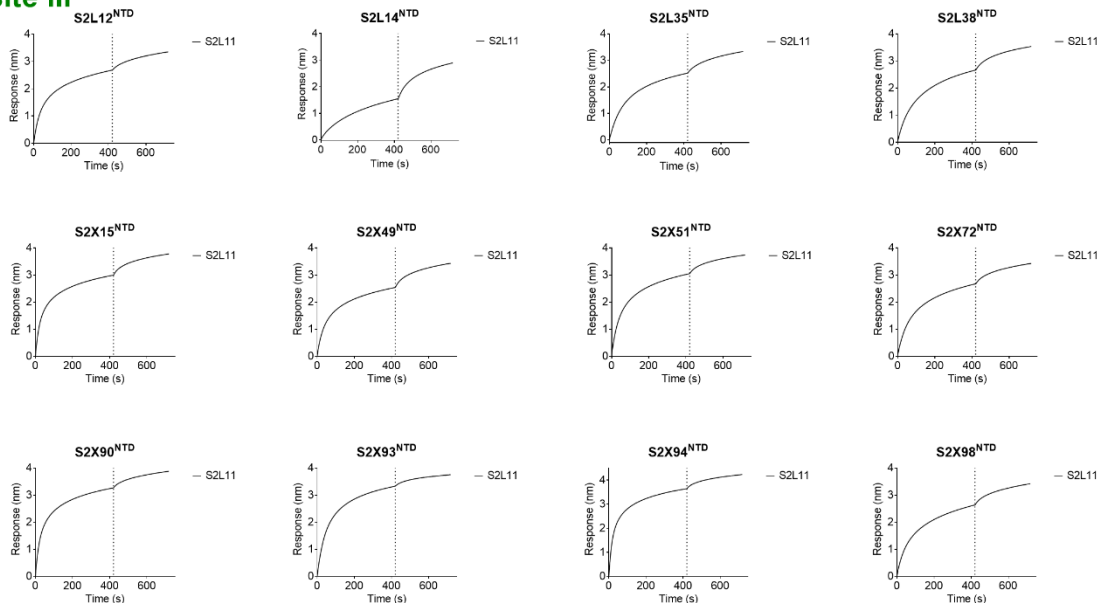

**site iii**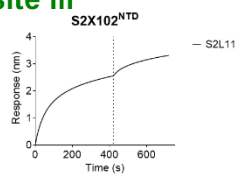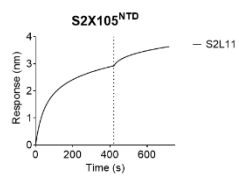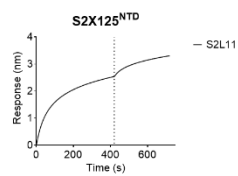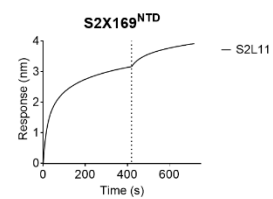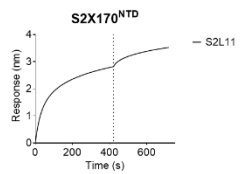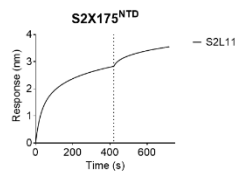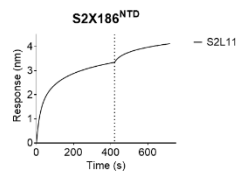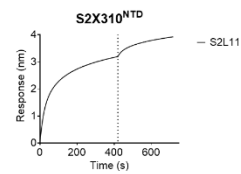**site iv**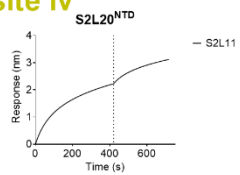**site v**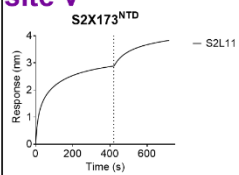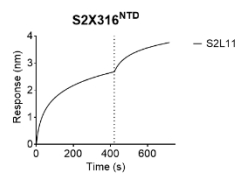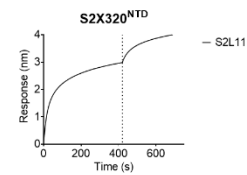**site vi**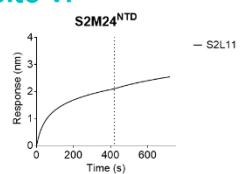

NTD mAb binding to a panel of sarbecovirus S glycoproteins analyzed by flow cytometry (MFI values). Related to Figure 4.

| Strain      | mAb   |       |       |       |       |       |       |       |        |        |        |        |        |        |        |        |
|-------------|-------|-------|-------|-------|-------|-------|-------|-------|--------|--------|--------|--------|--------|--------|--------|--------|
|             | S2L20 | S2L24 | S2L26 | S2L28 | S2L50 | S2M28 | S2X28 | S2X91 | S2X107 | S2X124 | S2X158 | S2X161 | S2X165 | S2X303 | S2X320 | S2X333 |
| SARS-CoV2   | 424   | 772   | 661   | 715   | 559   | 955   | 670   | 887   | 1313   | 814    | 724    | 760    | 893    | 1091   | 1077   | 921    |
| RaTG13      | 280   | 830   | 684   | 766   | 611   | 882   | 807   | 753   | 1069   | 740    | 722    | 767    | 844    | 849    | 1109   | 892    |
| Pangolin-GX | 931   | 352   | 144   | 71.7  | 44.7  | 404   | 53    | 473   | 102    | 1310   | 43.3   | 36.4   | 66.5   | 386    | 386    | 386    |
| Pangolin-GD | 32.6  | 34.8  | 35.3  | 133   | 40.8  | 191   | 69.5  | 37.8  | 77.9   | 31.6   | 25.9   | 28.5   | 37.9   | 61.1   | 77.1   | 64.6   |
| ZC45        | 23.8  | 22.3  | 22    | 21.5  | 20.3  | 44.1  | 43.3  | 28.3  | 73.4   | 26.3   | 24.7   | 25     | 41.4   | 44.6   | 45.5   | 38     |
| ZXC21       | 25.2  | 24.6  | 22.4  | 22.3  | 21    | 49.4  | 48.2  | 30.4  | 76.4   | 24.8   | 25.2   | 26.7   | 43.7   | 45     | 50     | 39.3   |
| SARS-CoV1   | 39.9  | 31.4  | 28.5  | 63.3  | 27.2  | 125   | 40.2  | 24.9  | 50.4   | 21.3   | 21.1   | 23.5   | 37.8   | 32.5   | 46.3   | 32.1   |
| YN2013      | 29.8  | 25.6  | 25.8  | 24.9  | 21.2  | 29.9  | 27.9  | 20.7  | 52.2   | 18.7   | 17     | 19.2   | 39.6   | 29.3   | 36.1   | 30.4   |
| BtK72       | 28.2  | 26.3  | 27.4  | 26.7  | 25.4  | 30.6  | 30.3  | 18.6  | 51.5   | 18.6   | 17.6   | 18.3   | 36.5   | 30.6   | 36.8   | 26.5   |
| BM48-31     | 32.6  | 29.9  | 29.1  | 30    | 25.6  | 31.8  | 30.7  | 19.8  | 55.1   | 18.6   | 17.5   | 18.8   | 37.2   | 29     | 35.8   | 27.7   |
| RmYN02      | 24.4  | 23.3  | 23.2  | 23.2  | 19.2  | 49.5  | 33.4  | 29.8  | 80.1   | 27.2   | 24.3   | 25.3   | 49.2   | 44.1   | 46     | 40.1   |



Binding of the S2X333, S2M28, S2L28, S2X28, S2L20 or 4A8 mAbs to immobilized NTD mutants analyzed by ELISA. Related to Figures 4 and 5.

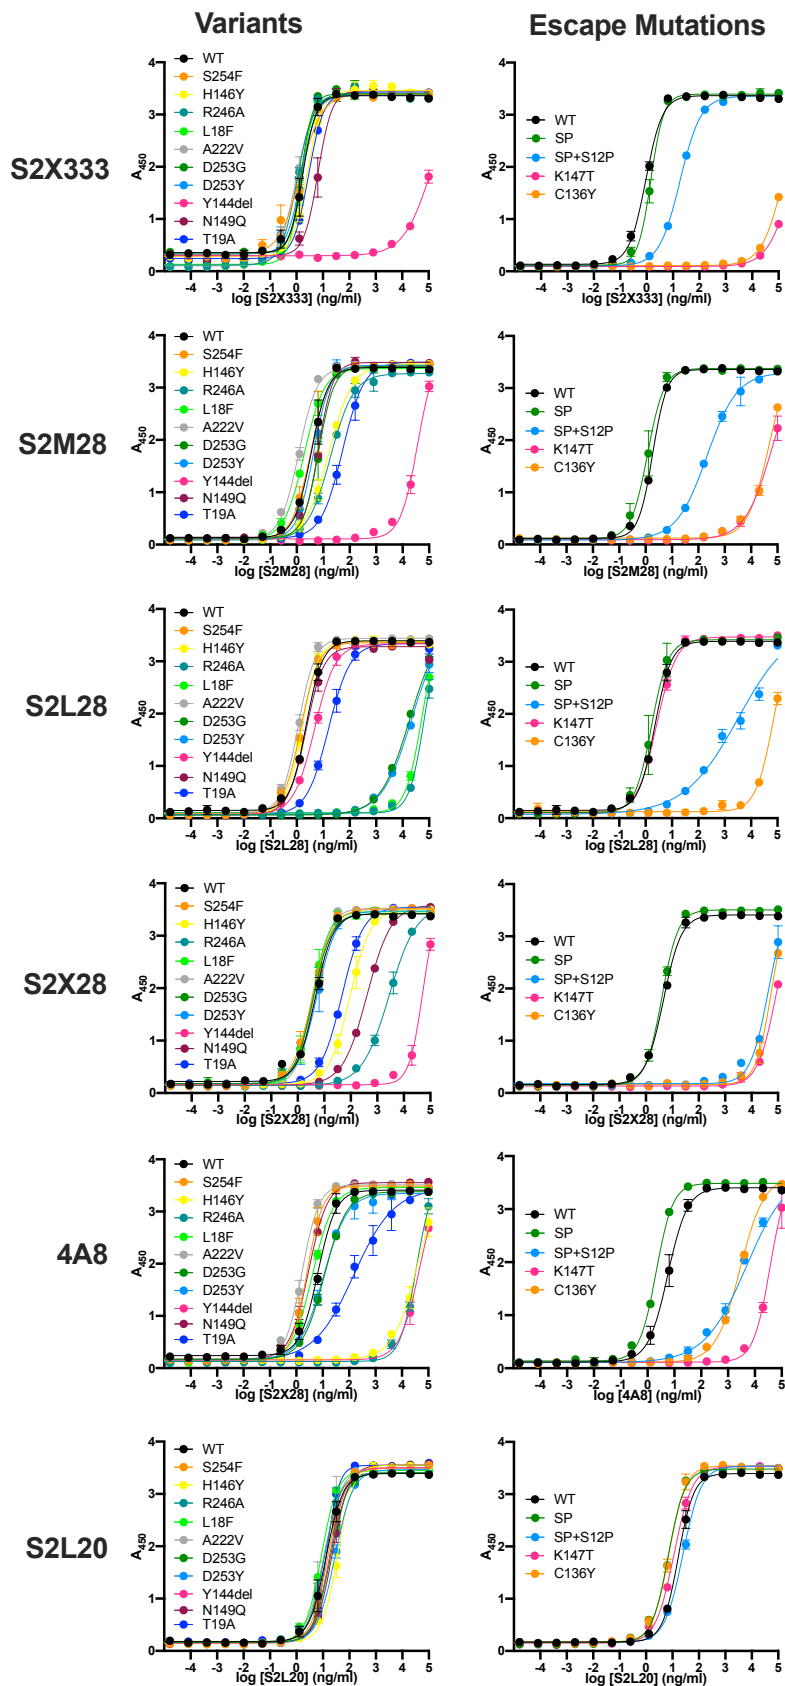

S2L28, S2M28, S2X28, and S2X333 escape clone sequencing results (VSV SARS-CoV-2 S experiments). Related to Figure 5.

| <b>S2L28</b>       |                    |               |
|--------------------|--------------------|---------------|
| <b>AA mutation</b> | <b>NT mutation</b> | <b>counts</b> |
| P9S                | C25T               | 3             |
| L18P               | TC53C              | 3             |
| T22P               | A63C               | 1             |
| K77E               | A229G              | 2             |
| D80N               | G238A              | 2             |
| P139S              | C415T              | 1             |
| F140S              | T419C              | 1             |
| S247R              | A739C              | 13            |
| D253E              | T759G              | 1             |
| D253G              | A758G              | 1             |
| S255F              | C764T              | 2             |
| G257S              | G769A              | 1             |
| W258R              | T772A              | 1             |

| <b>S2M28</b>       |                    |               |
|--------------------|--------------------|---------------|
| <b>AA mutation</b> | <b>NT mutation</b> | <b>counts</b> |
| P9Q                | C26T               | 2             |
| P9S                | C25T               | 3             |
| S12P               | T34C               | 1             |
| C15F               | G44T               | 1             |
| C15R               | T43C               | 1             |
| L18P               | T53C               | 10            |
| Y28C               | A83G               | 1             |
| G142D              | G425A              | 1             |
| K147Q              | A439C              | 1             |
| K147T              | A440C              | 2             |
| R246G              | A736G              | 4             |
| P251L              | C752T              | 1             |
| G252C              | G754T              | 1             |

| <b>S2X28</b>       |                    |               |
|--------------------|--------------------|---------------|
| <b>AA mutation</b> | <b>NT mutation</b> | <b>counts</b> |
| P9S                | C25T               | 1             |
| S12P               | T34C               | 3             |
| C15W               | T45G               | 1             |
| L18P               | T53C               | 6             |
| C136G              | T406G              | 1             |
| P139Q              | C416A              | 1             |
| F140S              | T419C              | 1             |
| L141S              | T422C              | 2             |
| G142C              | G424T              | 1             |
| G142D              | G425A              | 2             |
| Y144C              | T430A              | 1             |
| Y144N              | A431G              | 1             |
| K147E              | A439G              | 1             |
| K147Q              | A439C              | 3             |
| R158G              | A472G              | 1             |
| L244S              | T731C              | 5             |
| R246G              | A736G              | 7             |

| <b>S2X333</b>      |                    |               |
|--------------------|--------------------|---------------|
| <b>AA mutation</b> | <b>NT mutation</b> | <b>counts</b> |
| P9L                | C26T               | 1             |
| S12P               | T34C               | 2             |
| C15S               | T43C               | 2             |
| C15Y               | G44A               | 2             |
| L18P               | T53C               | 3             |
| C136S              | T406A              | 1             |
| C136Y              | G407A              | 3             |
| F140C              | T419G              | 1             |
| G142D              | G425A              | 1             |
| K147E              | A439G              | 1             |
| K147T              | A440C              | 1             |
